# Supplementary material
Source: MDPI journal article supplement (https://www.mdpi.com/2504-477X/7/2/51)
Supplement: s1 [file s1]

## **Supporting Information**

# **High-hardness, water-stable, and UV-resistant conductive coatings based on waterborne PEDOT:PSS/Epoxy/(KH560/SiO<sub>2</sub>) composite**

Zhanqi Li <sup>1</sup>, Ling Zhu <sup>2</sup>, Xiaowen Xie <sup>2</sup>, Meng Zhou <sup>2</sup>, Changqing Fu <sup>2,\*</sup> and Shuai Chen <sup>1,2,\*</sup>

<sup>1</sup> *School of Chemistry and Chemical Engineering, Jiangxi Science and Technology Normal University, Nanchang 330013, Jiangxi, China*

<sup>2</sup> *Jiangxi Engineering Laboratory of Waterborne Coatings, Nanchang 330013, Jiangxi, China*

\* *Correspondence: shuaichen@jxstnu.edu.cn; fuchq0791@163.com*

**Table S1.** Physical and chemical properties of the utilized materials.

| Materials             | Chemical structure                                                                  | Physical properties                    | Chemical properties                                             |
|-----------------------|-------------------------------------------------------------------------------------|----------------------------------------|-----------------------------------------------------------------|
| KH560                 | 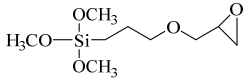   | Easily absorb<br>moisture              | Chemical reactions such<br>as grafting can occur                |
| Nano-SiO <sub>2</sub> |    | Nano size, easy to<br>aggregate        | Grafting reactions can<br>occur                                 |
| PSS-Na                |    | Water-soluble                          | /                                                               |
| EDOT                  |    | Slightly water-soluble                 | Polymerisation can<br>occur                                     |
| PEDOT:PSS             |   | Water dispersable                      | /                                                               |
| WR 2253               |  | Water-soluble and<br>water stable      | Cross-linking reactions<br>can occur                            |
| WRH 6765              | /                                                                                   | Water-soluble and<br>water dispersable | Opens the epoxy ring<br>when utilized as amine<br>curing agent. |

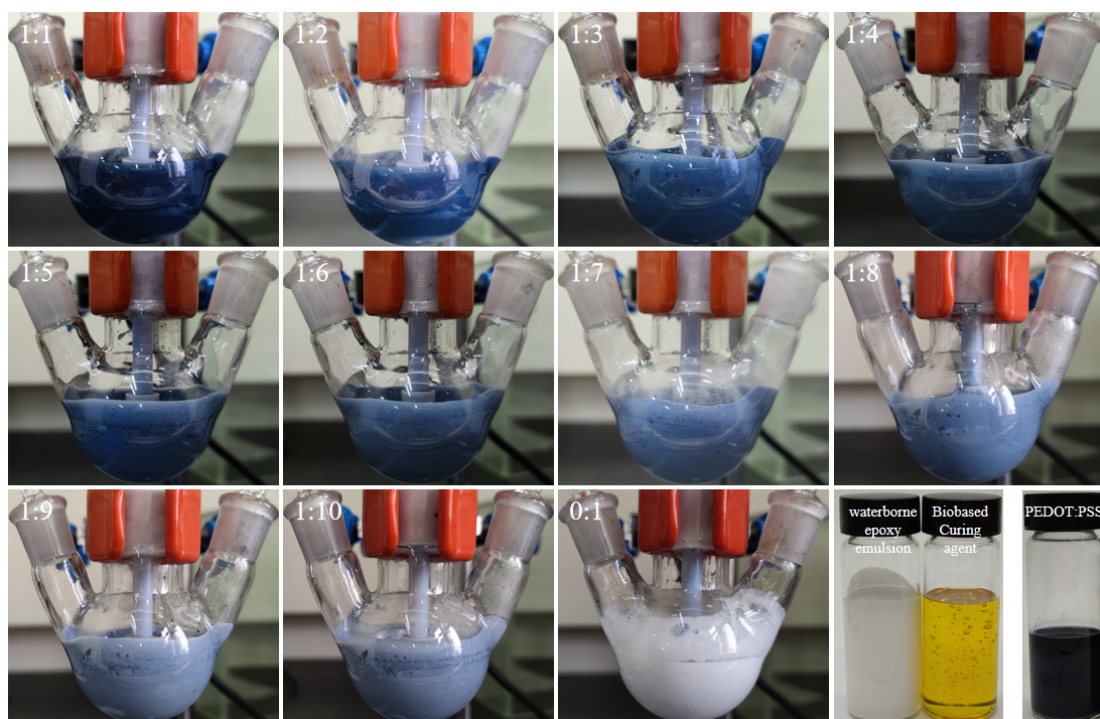

**Figure S1.** Photos of waterborne epoxy emulsion, biobased curing agent, and PEDOT:PSS/Epoxy aqueous dispersions with different P:E ratios.

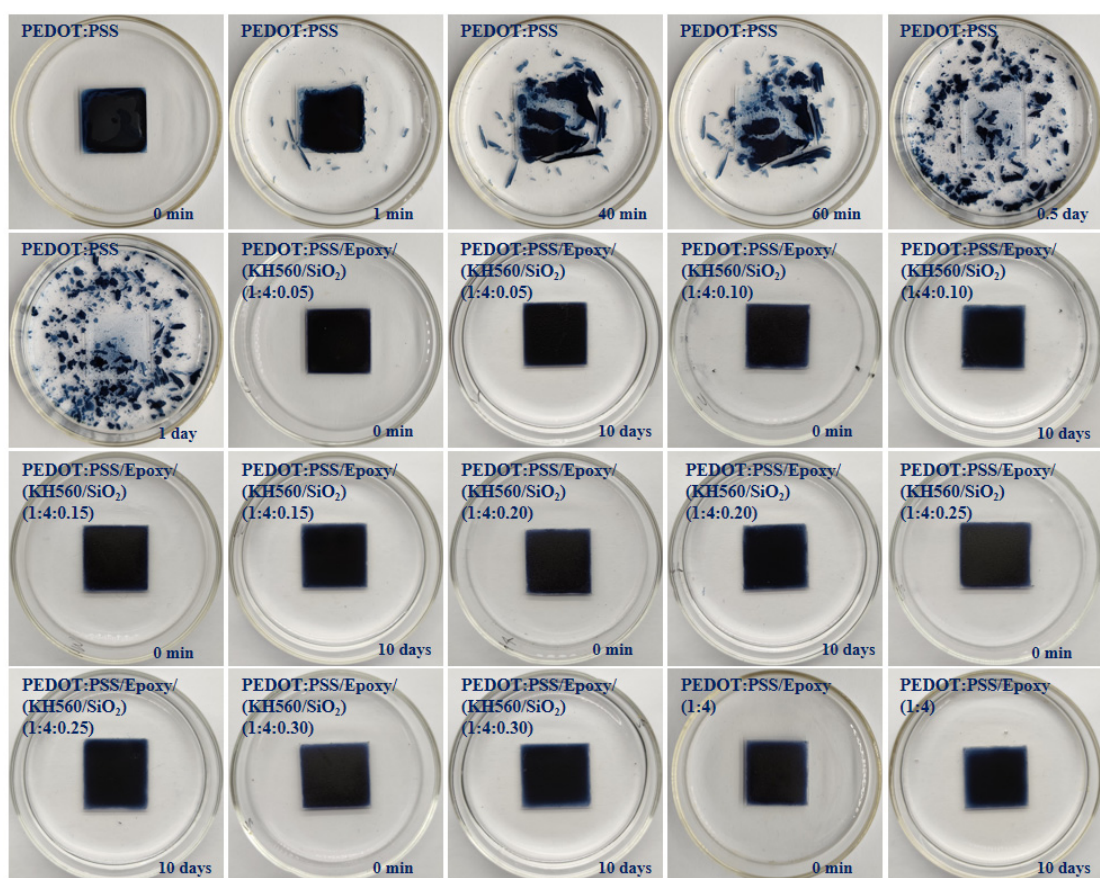

**Figure S2.** Water immersion experiment of PEDOT:PSS (0-1 day),

PEDOT:PSS/Epoxy (P:E= 1:4) (0 day, 10 days), and PEDOT:PSS/Epoxy/(KH560/SiO<sub>2</sub>) (0 days, 10 days) coatings.

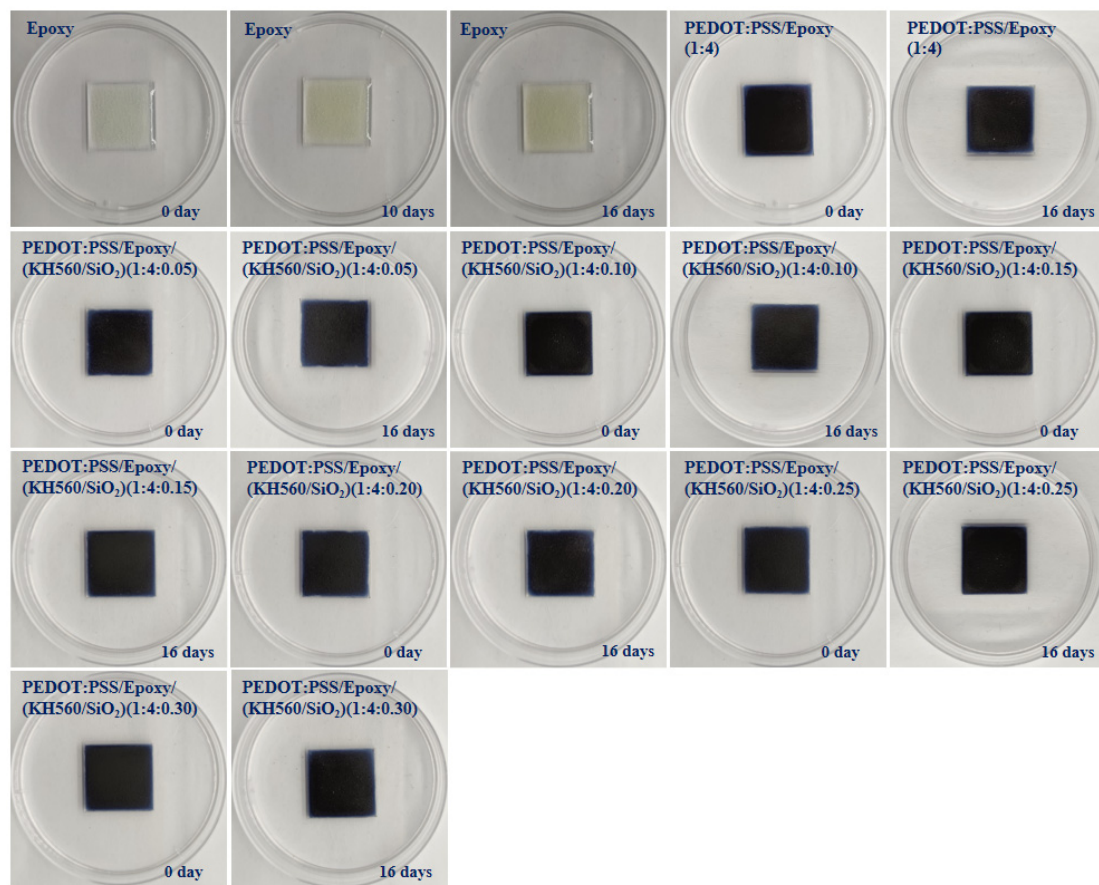

**Figure S3.** UV resistance experiment of Epoxy, PEDOT:PSS/Epoxy (P:E= 1:4), and PEDOT:PSS/Epoxy/(KH560/SiO<sub>2</sub>) coatings with different P:E:K ratios.
